# Supplementary material
Source: PubMed Central journal article supplement (PMC2675107)
Supplement: halms339565-supplement_1.pdf [file halms339565-supplement_1.pdf]

**Supplementary table 1. Main clinical characteristics of the patients included in the study**

|                                               | <b>Screening set<br/>CHOP</b> | <b>Screening set<br/>R-CHOP</b> | <b>Complementary set<br/>R-CHOP</b> |
|-----------------------------------------------|-------------------------------|---------------------------------|-------------------------------------|
| RNA analysis                                  | Affymetrix HU133A             | Affymetrix HU133A<br>+ TLDA     | TLDA                                |
| Number of pts                                 | 30                            | 23                              | 44                                  |
| Median age (min, max)                         | 69 (63-79)                    | 68 (59-78)                      | 69 (61-82)                          |
| Male/Female                                   | 16/14                         | 11/12                           | 22/22                               |
| IPI risk groups                               |                               |                                 |                                     |
| - 0/1                                         | 0                             | 0                               | 2                                   |
| - 2                                           | 5                             | 5                               | 14                                  |
| - 3                                           | 19                            | 7                               | 9                                   |
| - 4/5                                         | 6                             | 11                              | 19                                  |
| Median follow-up                              | 44 months                     | 45 months                       | 36 months                           |
| 5 years Overall survival<br>(95% CI)          | 33% (20-55)                   | 50% (30-80)                     | 68% (53-89)                         |
| 5 years Progression Free<br>Survival (95% CI) | 27% (15-48)                   | 55% (38-80)                     | 52% (36-75)                         |
| LNH 98.5                                      | 24                            | 19                              | 9                                   |
| Additional pts                                | 6                             | 4                               | 35                                  |
